1 **Long reads and Hi-C sequencing illuminate the two compartment genome of**  
2 **the model arbuscular mycorrhizal symbiont *Rhizophagus irregularis***

3 Gokalp Yildirim<sup>1\*</sup>, Jana Sperschneider<sup>2\*</sup>, Mathu Malar C<sup>1</sup>, Eric CH Chen<sup>3</sup>, Wataru Iwasaki<sup>3</sup>,  
4 Calvin Cornell<sup>1</sup> and Nicolas Corradi<sup>1#</sup>

5 <sup>1</sup> Department of Biology, University of Ottawa, ON, Ottawa, K1N 6N5, Canada

6 <sup>2</sup> Biological Data Science Institute, The Australian National University, Canberra, Australia

7 <sup>3</sup> Department of Integrated Biosciences, Graduate School of Frontier Sciences, The University of  
8 Tokyo, Japan

9 \* contributed equally

10 # Corresponding Author

11 **Abstract**

12 Chromosome folding links genome structure with gene function by generating distinct nuclear  
13 compartments and topologically associating domains (TADs). In mammals, these undergo  
14 preferential interactions and regulate gene expression. However, their role in fungal genome  
15 biology is unclear. Here, we combine Nanopore (ONT) sequencing with chromatin conformation  
16 capture sequencing (Hi-C) to reveal chromosome and epigenetic diversity in a group of obligate  
17 plant symbionts; the arbuscular mycorrhizal fungi (AMF). We find that five phylogenetically  
18 distinct strains of the model AMF *Rhizophagus irregularis* carry 33 chromosomes with  
19 substantial within species variability in size, as well as in gene and repeat content. Strain-specific  
20 Hi-C contact maps all reveal a ‘checkerboard’ pattern that underline two dominant euchromatin  
21 (A) and heterochromatin (B) compartments. Each compartment differs in the level of gene  
22 transcription, regulation of candidate effectors and methylation frequencies. The A-compartment  
23 is more gene-dense and contains most core genes, while the B-compartment is more repeat-rich  
24 and has higher rates of chromosomal rearrangement. While the B-compartment is  
25 transcriptionally repressed, it has significantly more secreted proteins and *in planta* up-regulated  
26 candidate effectors, suggesting a possible host-induced change in chromosome conformation.  
27 Overall, this study provides a fine-scale view into the genome biology and evolution of

28 prominent plant symbionts, and opens avenues to study the epigenetic mechanisms that modify  
29 chromosome folding during host-microbe interactions.

## 30 **Introduction**

31 Arbuscular mycorrhizal fungi (AMF) are obligate plant mutualistic organisms of the fungal  
32 subphylum Glomeromycotina (Spatafora *et al.*, 2016) that evolved a symbiotic relationship with  
33 the roots of most vascular plants species (Corradi & Bonfante, 2012; Martin *et al.*, 2017; Lutzoni  
34 *et al.*, 2018). During the AM symbiosis, these fungi enhance their host nutrient and water uptake  
35 in exchange of sugars and lipids, and provide an increased resistance against pathogens  
36 (Bonfante & Anca, 2009). The first fossil records of the AM symbiosis date several hundred  
37 million years, and today this symbiotic relationship between AMF and their plant hosts is  
38 widespread globally, highlighting AMF's capacity to persist in various environmental conditions  
39 (Delaux & Schornack, 2021). AMF spores and hyphae harbor up to thousands of coexisting  
40 nuclei at all times (Kokkoris *et al.*, 2020), and their genetics are defined by the presence of two  
41 life stages – i.e. the homokaryotic stage (AMF homokaryons), where co-existing nuclei are  
42 genetically largely uniform, and the heterokaryotic stage (AMF dikaryons), where nuclei  
43 originating from two parental strains coexist in the mycelium (Ropars *et al.*, 2016; Corradi &  
44 Brachmann, 2017; Chen *et al.*, 2018a; Kokkoris *et al.*, 2021).

45 Genome analyses revealed that species in the Glomeromycotina carry gene losses in cellular  
46 pathways that inhibit the metabolism of fatty acids, sugars and plant cell wall degradation  
47 enzymes (Tisserant *et al.*, 2013; Lin *et al.*, 2014; Chen *et al.*, 2018b; Morin *et al.*, 2019; Malar C  
48 *et al.*, 2021a), and contain an abundance of transposable elements (TE). Closely related AMF  
49 strains also vary dramatically in their gene content, suggesting that AMF have pangenomes  
50 (Chen *et al.*, 2018b; Mathieu *et al.*, 2018a). The pangenome concept highlights the distinction  
51 between 'core' conserved genes hypothesized to be essential for daily activities (e.g.  
52 cytoskeleton, protein translation, etc.), and 'dispensable' non-conserved genes thought to help  
53 individual strains adapt to changing environments and hosts (e.g. transduction signalling,  
54 effectors, etc.) (Li *et al.*, 2018; McCarthy & Fitzpatrick, 2019; Badet *et al.*, 2020) (Li *et al.*,  
55 2018; McCarthy & Fitzpatrick, 2019; Badet *et al.*, 2020).

56 Identifying the mechanisms from which pangenomes emerge is essential for understanding the  
57 mode of evolution of these widespread plant symbionts. In fungal plant pathogens, high repeat

58 content generates within-species genome variability and it was proposed that similar mechanisms  
59 drive genetic variability in AMF (Chen *et al.*, 2018b; Mathieu *et al.*, 2018a). However, this  
60 hypothesis is currently untestable for AMF because most available genome assemblies are highly  
61 fragmented – i.e. composed in many cases of dozens of thousands of contigs (Chen *et al.*, 2018b;  
62 Mathieu *et al.*, 2018b). This high fragmentation rate can generate mosaic sequences of multiple  
63 haplotypes (collapsed regions), chimeric assemblies and artificial gene duplications (Denton *et*  
64 *al.*, 2014; Montoliu-Nerin *et al.*, 2020), preventing fine-scale and reliable analyses of genome  
65 rearrangements, repeat diversity, and repeat plasticity within and across strains.

66 The highly fragmented state of AMF genomes also hampered the identification of mechanisms  
67 that define relationships between genome structure and function. Within nuclei, chromosomes  
68 separate into two groups: active open chromatin A-compartments (euchromatin) and less active  
69 chromatin B-compartments (heterochromatin) and each compartment can be differently  
70 regulated (Pombo & Dillon, 2015; Dekker & Heard, 2015; Szabo *et al.*, 2019; Kempfer &  
71 Pombo, 2020). This compartment-driven gene regulation highlights the key epigenetic role of  
72 chromosome folding for genome biology, but knowledge of this process in fungi was thus far  
73 restricted to a few model genera (e.g. *Sacharomyces*, *Neurospora*) and the filamentous fungus  
74 *Epichloë festucae* (Galazka *et al.*, 2016; Kim *et al.*, 2017; Winter *et al.*, 2018).

75 In the plant symbiont *E. festucae*, chromosome folding and repetitive elements together divide  
76 the genome into distinct regions with very similar gene expression suggesting that both genome  
77 characteristics co-regulate symbiotic associations in this species. However, whether similar  
78 mechanisms drive gene expression and symbiotic associations in other fungal symbionts,  
79 including AMF, is unknown. Here, we aimed to obtain a complete understanding of the AMF  
80 genome biology and within species genome dynamics by acquiring long-read and strain-specific  
81 high-throughput chromatin conformation capture (Hi-C) sequencing data (Schmitt *et al.*, 2016)  
82 from five phylogenetically distinct homokaryotic strains of the species *R. irregularis*.

## 83 **Materials and Methods**

### 84 *Culturing, DNA Extraction and ONT/Hi-C Sequencing*

85 *R. irregularis* strains A1 (DAOM-664342), B3 (DAOM-664345) and C2 (DAOM-664346) were  
86 originally isolated from Switzerland (Tänikon), while the strain DAOM-197198 was originally  
87 isolated from Pont Rouge, Canada (Koch *et al.*, 2004; Stockinger *et al.*, 2009) and the strain

88 4401 (DAOM-240446) was isolated from *Ammophila breviligulata* in “La Martinique Îles-de-la-  
89 Madeleine” (Canada).

90 All five strains were cultured *in vivo*, using *Daucus carota* root organ cultures (ROCs) as the  
91 host, as previously described (Corradi *et al.*, 2004). The strains propagated in two-compartment  
92 ROCs, allowing us to produce mycelium and spores without obvious contaminants. For Oxford  
93 Nanopore (ONT) sequencing, high quality, high molecular weight DNA was extracted for the  
94 strains A1, C2, B3 and 4401 using a protocol proposed by Schwessinger (Schwessinger, 2016).  
95 Following extraction, high quality DNA samples were processed using Nanopore Ligation  
96 Sequencing Kit SQK-LSK109 to prepare the sequencing libraries, which were sequenced using  
97 the MinION R9.4.1 flowcells to produce an average of 8.45 million reads with an N50 > 4Kb,  
98 reaching to a genome coverage of 160x.

#### 99 *Chromosome assembly and annotation*

100 ONT reads were basecalled with guppy (version 4.5.2) using the “high accuracy” configuration  
101 (dna\_r9.4.1\_450bps\_hac.cfg), and were used to generate assemblies using Canu (version 2.0)  
102 (Koren *et al.*, 2017). These assemblies were then further polished using Racon (v 1.4.10) (Vaser  
103 *et al.*, 2017) using the default parameters and the consensus sequences were created using  
104 Medaka (version 1.0.3). The polishing step was concluded with two rounds of Pilon (version  
105 1.23) using Illumina reads and default parameters (Walker *et al.*, 2014). Illumina reads were then  
106 mapped on the polished contigs using bwa mem (version 0.7.17) (Li, 2013) and the read  
107 coverage of each contig was calculated using bedtools (version 2.26.0) (Quinlan & Hall, 2010).  
108 Contigs having abnormally low (<5x) and high (>200x) coverages were filtered out using  
109 purge\_haplotigs (Roach *et al.*, 2018), and the remaining contigs were used for further  
110 scaffolding. Illumina reads used for polishing from the strains A1, B3 and C2 were obtained  
111 from Ropars *et al.* (Ropars *et al.*, 2016), DAOM197198 reads were obtained from Chen *et al.*  
112 2018(Chen *et al.*, 2018b), 4401 Illumina reads were used in this study for the first time.

113 Approximately 200 mg of fresh mycelium from each strain was crosslinked and shipped to Phase  
114 Genomics (Seattle, WA) to obtain strain-specific Hi-C data. Hi-C data was produced using the  
115 Proximo Hi-C Kit (Microbe) at the Phase Genomics with DPNII restriction enzymes. Before  
116 generating high-throughput Hi-C Illumina data, the quality of these libraries was assessed by  
117 mapping a low coverage paired-end data onto available *R. irregularis* assemblies. A library is

118 deemed to be of high quality if the fraction of high quality paired-end reads mapping  
119 respectively > 10KB apart within and across publicly available contigs exceeds 1.5% and 5.0%.  
120 In all cases, the values obtained for our samples far exceeded the QC limits set by Phase  
121 Genomics (Seattle, WA) – e.g. average 11.75% and 23%.

122 The subsequent Illumina library preparation and sequencing yielded paired-end Hi-C reads of  
123 150 bp at 75x-150x coverage. Scaffolding was carried out with contigs that were obtained using  
124 Canu and strain-specific Hi-C data. For scaffolding, the Hi-C reads were first mapped to each  
125 contig using BWA-MEM 0.7.17 (Li, 2013). Alignments were then processed with the Arima  
126 Genomics pipeline (Arima Genomics, 2019). Scaffolding was performed using SALSA 2.2  
127 (Ghurye *et al.*, 2017, 2019) and subsequent manual curation was guided by Hi-C contact maps.  
128 For strain C2, SALSA scaffolding resulted in 202 scaffolds from 325 contigs and 15 contigs  
129 were broken based on Hi-C contact map information. For strain A1, SALSA resulted in 107  
130 scaffolds from 276 contigs and 14 contigs were broken based on Hi-C contact map information.  
131 For strain 4401, SALSA resulted in 108 scaffolds from 306 contigs and 13 contigs were broken  
132 based on Hi-C contact map information. For strain B3, SALSA resulted in 138 scaffolds from  
133 314 contigs and 13 contigs were broken based on Hi-C contact map information. In the strain  
134 DAOM-197198 SALSA resulted in 153 scaffolds from 210 contigs, and one contig was broken  
135 based on Hi-C contact map information.

136 Gene annotation was achieved by using Funannotate (version 1.7.4)  
137 (<https://zenodo.org/record/2604804#.YpM336iSnIU>) on repeat-masked genome assemblies.  
138 Genome annotations were performed using RNA-seq reads and protein models for the strains  
139 DAOM197198, A1, B3 and C2 available from the Joint Genome Institute (JGI; (Chen *et al.*,  
140 2018b)). For the strain 4401, genome annotation was carried by combining EST, RNA-seq and  
141 models from the strains DAOM197198, C2 and B3. The quality of annotations was evaluated  
142 using the Benchmarking Universal Single-Copy Orthologs (version 4.0, database Obd\_10)  
143 (Simão *et al.*, 2015).

144 Conserved protein domains were predicted using Pfam v.27 (El-Gebali *et al.*, 2019). SignalP 4.1  
145 (-t euk -u 0.34 -U 0.34)(Petersen *et al.*, 2011) and TMHMM 2.0(Krogh *et al.*, 2001) were used to  
146 predict secreted proteins. A protein was called secreted if it was predicted to have a signal  
147 peptide and but no transmembrane domains. Effector candidates were predicted with EffectorP

148 3.0(Sperschneider & Dodds, 2021). De novo repeats were predicted with RepeatModeler 2.0.0  
149 and the option -LTRStruct (Flynn *et al.*, 2020). These were merged with the RepeatMasker  
150 repeat library and RepeatMasker 4.1.0 was run with this combined repeat database (Smit *et al.*).  
151 Transposable element locations were extracted from the Repeatmasker output file using an R  
152 script and simple repeats, unknown and low complexity repeats, satellites, tRNA, snRNA and  
153 rRNAs were filtered out from the output file. PfamScan (Hancock & Bishop, 2004; Li *et al.*,  
154 2015) was used with default parameters to identify the protein domain annotations in all strains.  
155 To create the Pfam heatmaps, the domain numbers were counted for each *R. irregularis* strain or  
156 A/B compartment, and a t-test conversion was made to highlight the protein domain abundances  
157 for each category.

158 We used mash dist (version 2.2.0) (Ondov *et al.*, 2016) for *k-mer* distance calculations and  
159 dnadiff from the MUMmer (Kurtz *et al.*, 2004; Marçais *et al.*, 2018) suite for structural variation  
160 calculations between strains and compartments. Orthology analyses were made by FastOrtho  
161 (Wattam *et al.*, 2014), using following parameters: 50% identity and 50% coverage using protein  
162 sequences of all five assemblies. All karyoplots were produced using KaryoploteR (Gel & Serra,  
163 2017). All genome data and reads newly obtained are available in Genbank under the BioProject  
164 PRJNA748024.

### 165 *Identification of chromosome compartments and topologically associated domains*

166 We called A/B compartments and TADs with hicexplorer 3.6 (Ramírez *et al.*, 2018) using the  
167 commands hicPCA and hicFindTADs, respectively. Inter- and intra-chromosomal Hi-C contact  
168 maps were produced with HiC-Pro 2.11.1 (Servant *et al.*, 2015) (MAPQ=10) and hicexplorer  
169 3.6 (Ramírez *et al.*, 2018; Wolff *et al.*, 2018, 2020; Winter *et al.*, 2018) and these Hi-C contact  
170 maps were manually inspected to assign chromosomal regions to A/B compartments.  
171 Specifically, the regions along the each chromosomes carrying the same PCA1 values – i.e.  
172 positive or negative – were assigned to the same compartment. Following this assignment,  
173 compartments were manually inspected to investigate their proximity with other chromosomes.  
174 Those in close physical proximity with the smallest chromosomes were assigned to compartment  
175 A, while those carrying the counterpart PCA1 signal were assigned to compartment B. This  
176 process was manually repeated for all 33 chromosomes individually to separate the chromosomal

177 regions into separate A/B compartments. Bedtools (Quinlan & Hall, 2010) was used to assess  
178 overlap between genomic features such as genes/repeats and compartments.

### 179 *Methylation and gene expression analyses*

180 Megalodon (version 2.2.9) was used for methylation calling using the high accuracy parameters  
181 (dna\_r9.4.1\_450bps\_modbases\_dam-dcm-cpg\_hac.cfg) configuration file. After methylation  
182 calling was completed for all five assemblies, CG positions and their methylation frequencies  
183 were extracted from the 5mC bedfile output. For RNA-seq analyses, Salmon v.1.3.0 (Patro *et al.*,  
184 2017) was used to align clean RNA-seq reads to the transcripts and to estimate transcript  
185 abundances in each sample (salmon index -keepDuplicates and salmon quant -  
186 validateMappings). We used tximport and DESeq2 (Love *et al.*, 2014) to assess gene differential  
187 expression ( $\text{padj} < 0.1$ ). The DAOM-197198 RNA-seq datasets used in this study were  
188 obtained from germinating spores (SRR1979300-SRR1979302), as well as intra-radical material  
189 isolated from *Medicago Trunculata* (SRR5644319-SRR5644324) and *Allium schoenopasum*  
190 (SRR5644331- SRR5644333).

## 191 **Results**

### 192 *Assembly and annotation of Rhizophagus irregularis chromosomes*

193 Basecalled and polished ONT data from four homokaryotic strains (A1, B3, C2 and 4401) were  
194 assembled using Canu (Koren *et al.*, 2017), and then scaffolded using strain-specific Hi-C data.  
195 The same scaffolding procedures were performed on a previously published PacBio assembly of  
196 the model AMF strain DAOM197198 (Maeda *et al.*, 2018). This approach resulted in an average  
197 of 137 scaffolds with an N50 score of 5 Mb, which were further curated into 33 chromosome-  
198 scale scaffolds in each strain, guided by Hi-C contact maps (**Table 1, Figure S1**).

199 When combining the five strains, we found telomeres on both ends for 32 of the 33  
200 chromosomes (only chromosome 2 has telomeres on only one end in all strains). Genome sizes  
201 are very similar in the model strain DAOM197198, A1, B3 and 4401 at 146-147 Mb, while the  
202 C2 strain harbors a larger genome at 162 Mb, consistent with published flow cytometry analyses  
203 (Ropars *et al.*, 2016). For all five strains, the number of unplaced contigs is small (12-104  
204 contigs at size 0.4-2.6 Mb) and all unplaced contigs are short indicating that the chromosome  
205 assemblies are near-complete (**Table 1, Figure S1**).

206 We identified an average of 76 families of repeats and known transposable elements (TE)  
207 encompassing on average 50.2% of the genome (**Figure S2**). When only TEs are considered,  
208 repeat density varies across chromosomes of different strains. For DAOM197198, A1 and B3  
209 assemblies, chromosome 2 has the highest TE density (17.2%, 14.8% and 14.8% respectively),  
210 whereas the highest TE density is chromosome 33 for the C2 assembly (20.8%), and  
211 chromosome 23 for the 4401 assembly (15.6%). The chromosome with the lowest TE density is  
212 chromosome 20 for A1 and B3 (8.5% and 9.4%, respectively), chromosome 28 for  
213 DAOM197198 (9.2%), chromosome 3 for C2 (11.9%) and chromosome 8 for 4401 (7.3%).

214 Gene annotation identified between 23,693 to 26,820 genes, in line with past work based on  
215 fragmented datasets (Chen *et al.*, 2018b), and BUSCO completeness averages 96% (**Table 1**).  
216 Gene density varies among chromosomes, with chromosome 32 always having the highest  
217 density while chromosome 15 the lowest (**Figure S1**). A hallmark of AMF is that they carry  
218 divergent rRNA operons within their genome. In DAOM197198 one rRNA operon is found on  
219 chromosome 9, two operons co-locate on chromosomes 23 and 28, and five are present in  
220 chromosome 18 (**Figure S1**). The putative AMF mating-type locus (Ropars *et al.*, 2016) is  
221 located on chromosome 11 in all strains (**Figure S1**).

#### 222 *Within species chromosome diversity in R. irregularis*

223 Consistent with previous reports on fragmented assemblies (Chen *et al.*, 2018b), the *R.*  
224 *irregularis* gene content is divided into genes shared by all strains (core genes) and genes shared  
225 by only a few strains or strain-specific (dispensable) (**Figure S3a**), and on average only 55.8% of  
226 *R. irregularis* genes are core (Chen *et al.*, 2018b). Our analyses confirm that within species  
227 variability affects the number of rRNA operons (**Figure 1a, Table S1**) (Corradi *et al.*, 2007), and  
228 each strain carries a distinct abundance of protein domains (**Figure S3b**) (Chen *et al.*, 2018b).

229 Homologous chromosomes often differ in size between strains. For example, the largest  
230 chromosome of the 4401 strain is chromosome 8 at 6.3 MB in size but this chromosome is only  
231 5.2 MB in DAOM197198 (**Figure 1b**). The chromosome with the putative MAT-locus  
232 (Chromosome 11) varies in size from a maximum of 5.6 Mb in C2 to a minimum of 5 Mb in  
233 4401, even though they carry the same mating type (**Figure 1c**). We used a *k*-mer distance  
234 measure to assess relatedness of strains and their chromosomes. Overall, the strain  
235 DAOM197198 is related to the strain 4401, strains B3 and A1 are related, and C2 is the most



236 distant (**Figure S4**). However, this is not consistent across all chromosomes. For example,  
237 chromosome 8 shows higher levels of similarity between strain DAOM197198 and the strains  
238 B3 and A1 while chromosome 25 shows higher levels of similarity between strain 4401 and the  
239 strains B3 and A1 (**Figure S4**). These results support past reports of phylogenetic incongruence  
240 and inter-strain genetic exchange in *R. irregularis* (Riley *et al.*, 2014; Chen *et al.*, 2018b).

#### 241 *The chromosomes of Rhizophagus irregularis form a two-compartment genome*

242 Hi-C sequencing also generated direct, quantitative evidence of the 3D nuclear organization in  
243 five *R. irregularis* strains. For the strains DAOM197198, A1 and C2, this revealed that  
244 chromosomes form a distinct ‘checkerboard’ pattern that defines the long-range interactions that  
245 form two nuclear A/B compartments in eukaryotes, including fungi (Fortin & Hansen, 2015;  
246 Kim *et al.*, 2017; Spielmann *et al.*, 2018; Winter *et al.*, 2018; Falk *et al.*, 2019) (**Figure 2**,  
247 **Figures S5-10**).

248 In the model strain DAOM197198, the A-compartment has a total size of 58.1 Mb while B-  
249 compartment is 73.5 Mb, and respectively each contains 96 and 83 TADs. Chromosome varies in  
250 the degree of compartmentalization – e.g. chromosome 2 has consistent swaps between A- and  
251 B-compartment, while the A-compartment dominates in the smallest chromosomes (chr30 – 33)  
252 (**Figure S6-10**). Although *Rhizophagus irregularis* Hi-C contact maps did not show easily  
253 recognizable centromere hotspots found in rust fungi (Sperschneider *et al.*, 2021), these reveal  
254 telomere-to-telomere interactions that define all chromosomes boundaries and confirm our  
255 assembly. Changes in Hi-C contacts between homologous chromosomes of different strains are  
256 also linked with the emergence of large strain-specific repeat and gene expansions (**Figure**  
257 **S11a**), or inversions (**Figure S11b,c,d**).

258 In the model strain DAOM197198, the A-compartment is more gene dense with 2.55 genes and  
259 18.21 repeats per 10 Kb, while the B-compartment carries an average of 1.74 genes and 18.9  
260 repeats per 10 Kb (**Figure 3a, Table S2**). The A-compartment also codes for 90% of BUSCO  
261 proteins, and double the number of core genes (**Figure S12**), while B-compartment carries most  
262 dispensable genes and many highly expanded families – e.g. Tyrosine Kinases, the  
263 tetratricopeptide repeat Sel-1, the homodimerization BTB. The large high mobility box (HMG)  
264 gene family is, however, predominant in the B-compartment (**Figure 3b**). Remarkably, while the  
265 B-compartment is less gene-dense, it is enriched for predicted secreted proteins as well as for

266 candidate apoplasmic and cytoplasmic effectors and carries the cytoplasmic *R. irregularis* effector  
267 SP7 on chromosome 1 (Kloppholz *et al.*, 2011).

268 We hypothesized that the distinct gene and repeat densities result in different structural  
269 rearrangement rates between A/B compartments. We measured the degree of structural variation  
270 and sequence identity of each compartment, and found that the sequence alignments between  
271 strains in the B-compartment are shorter and have lower sequence identity than sequence  
272 alignments in the A-compartment. The B-compartment also contains more structural variation  
273 (**Table S3, Figure S13**).

#### 274 *Gene expression and methylation in chromosomal compartments*

275 In other organisms, euchromatin (A compartments) is generally transcriptionally active while  
276 heterochromatin (B compartments) are repressed (Szabo *et al.*, 2019; Zheng & Xie, 2019;  
277 Jerković *et al.*, 2020). To test if this dichotomy also applies to AMF, we investigated gene  
278 expression between compartments in DAOM197108 using three high quality RNA-seq datasets  
279 obtained from intra-radical hyphae in symbiosis with *Allium*, arbuscules in symbiosis with  
280 *Medicago* and germinating spores (Kamel *et al.*, 2017; Zeng *et al.*, 2018).

281 In *R. irregularis*, genes in the A compartment have, on average, significantly higher expression  
282 levels than those in the B compartment (**Figure 4a**). However, this compartment also has lower  
283 expression levels in the *in planta* conditions (*Allium*: 57.3 TPMs; *Medicago*: 56 TPMs) than in  
284 germinated spores (62.4 TPMs). Remarkably, the inverse pattern is observed for genes in the B-  
285 compartments, which have higher expression levels in the *in planta* conditions (*Allium*: 16.8  
286 TPMs; *Medicago*: 19.5 TPMs) than in germinated spores (11.2 TPMs), and genes encoding  
287 secreted proteins are significantly up-regulated in both *in planta* conditions in the B-  
288 compartment, but not in the A-compartment (**Figure 4b**). We also aimed to investigate the  
289 expression of these regions within TAD, and found that genes tend to be co-regulated when they  
290 are located in the same TAD in the A-compartment, while co-regulation within the same TAD  
291 was not observed for the B-compartment (**Figure S14**).

292 We used ONT sequencing to call methylated sites and test if the difference in the A/B  
293 compartment gene expression resulted from different methylation patterns (Lea *et al.*, 2018;  
294 Dallaire, 2021). In DAOM197198 strain, CG dinucleotides are highly enriched for 5mC  
295 methylation – i.e. 11.88% for CG compared to 0.72 to 3.95% for other dinucleotides contexts

296 (CA, CC, CT) – 6mA methylation is very low regardless of dinucleotide contexts (AA, AC, AG,  
297 AT: 0.01% to 0.06). This indicates that 5mC methylation in the CG dinucleotide context is the  
298 primary DNA methylation process active in this species.

299 Overall, the CpG sites are significantly more methylated in the A-compartment, particularly for  
300 highly methylated sites (methylation frequency > 80%) (**Figure S13a**). Within the B  
301 compartment, 22.5% of all protein encoding genes are highly methylated compared to 18.4% in  
302 the A-compartment (**Figure 4c**). When TEs are considered, this is inversed with 67% of  
303 methylated TEs families (24 out of 35) being highly methylated in the A-compartment compared  
304 to only 25% for the B -compartment (9 out of 36) (**Figure S13b**). Among TEs that are  
305 compartment specific - e.g. Ginger DNA 2, DNA Zisupton and LINE Penelope are only found in  
306 compartment B and the LINE -Tad, and LINE R1-LOA carried by the A-compartment – only  
307 those located in the A-compartment are methylated.

## 308 **Discussion**

### 309 *A chromosome-level view of a model AMF pangenome*

310 The present study confirms that the combined number of genes within the model AMF *R.*  
311 *irregularis* far exceeds that found in individual strains (Chen *et al.*, 2018b; Mathieu *et al.*, 2018b;  
312 Reinhardt *et al.*, 2021). It also revealed that strains in this model species carry 33 homologous  
313 chromosomes (possibly the largest number identified in a fungus) and within-species variability  
314 in chromosome size and epigenetics (folding and methylation).

315 Size difference among homologous chromosomes affects all strains, regardless of their  
316 phylogenetic clustering (Savary *et al.*, 2018; Chen *et al.*, 2018b; Kokkoris *et al.*, 2021) or MAT-  
317 locus identity – e.g. strains C2 and 4401 carry the MAT-locus-6 (as defined by (Ropars *et al.*,  
318 2016)) on chromosome 11 but this chromosome is 640 Kb larger in C2 compared to 4401.  
319 Despite this variability, all strains analysed carry the same number of homologous chromosomes,  
320 and future studies may reveal if this characteristic defines species boundaries in this  
321 taxonomically challenging taxon (Bruns *et al.*, 2018).

### 322 *Chromosome compartments dictate AMF genome biology and evolution*

323 Hi-C data revealed that AMF chromosomes separate into locations with euchromatin  
324 (transcriptionally active A-compartment) and heterochromatin (transcriptionally less active B-

325 compartments) that regulate both the expression and evolution of distinct molecular functions. In  
326 the A-compartment, higher gene density and repeat methylation indicates a tighter control of  
327 repeat expansions that could be deleterious for a region that contain most core genes. In contrast,  
328 the B-compartment experiences higher gene and lower repeat methylation rates, which explains  
329 its reduced gene expression levels and higher rearrangement rates.

330 It was proposed that AMF and notorious plant pathogens (e.g. *Fusarium oxysporum*, *Verticillium*  
331 *dahlia*; *Zymoseptoria tritici*) evolved similar genomic strategies to cope with their evolving plant  
332 hosts and competitors (Reinhardt *et al.*, 2021). The A/B compartments are reminiscent of the  
333 “two-speed genome architecture” reported in some fungal plant pathogens, where highly  
334 repetitive and rapidly rearranging genomic regions that express secreted proteins (i.e. analogous  
335 to B-compartments) separate from gene-rich locations that carry most core genes (i.e. analogous  
336 to A-compartments) (Mathieu *et al.*, 2018a). Another similarity with plant pathogens is the  
337 presence in *R. irregularis* strains of many dispensable and lineage-specific genes. Despite this  
338 genomic resemblance, however, our analyses did not reveal the presence in *R. irregularis* of  
339 dispensable chromosomes that drive the adaptation of fungal plant pathogens to changing  
340 environments (Garmaroodi & Taga, 2007; Vlaardingerbroek *et al.*, 2016; Bertazzoni *et al.*,  
341 2018).

#### 342 *A role of a two-compartment genome in plant colonization?*

343 We showed that the A/B compartments have distinct epigenetic signatures, and in line with  
344 mammalian studies, the A-compartment in *R. irregularis* is transcriptionally active whereas the  
345 B-compartment is repressed. However, we also found that this does not hold true for genes  
346 encoding secreted proteins and candidate effectors. During two *in planta* conditions, we  
347 observed increased up-regulation of genes encoding secreted proteins in the B-compartment, but  
348 not in the A-compartment. This suggests that the repressed state of the B-compartment might be  
349 relaxed during plant colonization, possibly induced through signals from the plants (Plett &  
350 Martin, 2012). In the fungal pathogen *Leptosphaeria maculans* epigenetic control mechanisms  
351 lead to effector gene regulation (Soyer *et al.*, 2014). As our Hi-C data derives from extraradical  
352 mycelium, acquiring similar data *in planta* may show that intra-radical mycelium carries distinct  
353 chromosome conformations that lift repression for the *R. irregularis* B-compartment  
354 (Frantzeskakis *et al.*, 2019; Torres *et al.*, 2020).

355

## 356 **Conclusions**

357 Combining long-reads with Hi-C sequencing demonstrates that model arbuscular mycorrhizal  
358 symbionts all carry 33 chromosomes with contents and sizes that varies significantly among  
359 strains. This supports the notion that AMF have pangenomes and, more generally, that  
360 conspecific strains should never be assumed to have identical genomes and genes (Malar C *et al.*,  
361 2021b).

362 Our work also uncovered a higher-order genome organization that governs AMF genome  
363 biology and evolution. Dispensable genes and the most expressed and regulated secreted proteins  
364 - i.e. those potentially involved in the molecular dialogue with the plant hosts - locate primarily  
365 in the rapidly evolving B-compartments, while highly expressed core genes and tightly regulated  
366 TADs are mostly restricted within the slowly evolving A-compartment. In other organisms, the  
367 A/B compartments change depending on the cell life-stage (Falk et al., 2019). Within this  
368 context, our findings raise the intriguing possibility that similar changes also occur depending on  
369 the fungal and plant symbiotic status, and open avenues to identify the epigenetic mechanisms  
370 that generate and modify chromosome compartments during host-microbe interactions.

371 It will be now interesting to examine how this work extrapolates to AMF dikaryons, in particular  
372 how these strains compartmentalize their co-existing parental genomes and if these also  
373 significantly differ in gene content and size. Phasing parental genomes with high-quality Hi-C  
374 data is a requirement to fully address these questions, and determine how co-existing genomes  
375 regulate nuclear dynamics in these strains (Serghi *et al.*, 2021; Kokkoris *et al.*, 2021).

## 376 **Acknowledgments**

377 We thank Benjamin Schwessinger and Daniel Croll for their helpful comments on an earlier  
378 version of this manuscript, and Christophe Roux for providing information about publicly  
379 available, high-quality RNA-seq data. Our research is funded by the Discovery program of the  
380 Natural Sciences and Engineering Research Council (RGPIN2020-05643), a Discovery  
381 Accelerator Supplements Program (RGPAS-2020-00033). N.C. is a University of Ottawa  
382 Research Chair in Microbial Genomics. J.S. is supported by an Australian Research Council  
383 (ARC) Discovery Early Career Researcher Award (DE190100066), and E.C. and W.I. were

384 supported by JSPS Postdoctoral Fellowships for Research in Japan and JSPS KAKENHI Grant  
385 Number 19F19089.

### 386 **Figure legends**

387 **Figure 1:** Examples of variability in the size, and gene content and density between the  
388 homologous chromosomes of *R. irregularis* strains analyzed in this study. Red density plot shows  
389 gene density, and blue density plot shows repeat density. The colors of karyoplots indicate  
390 different strains. **A) Homologous chromosomes contain different rRNA operon copy  
391 numbers.** Chromosome 18 of C2 contains only four operon copies, whereas strain B3 carries six  
392 copies on the same chromosome. **B) Homologous chromosomes vary greatly in size.** Size  
393 difference between chromosome 8 of 4401 strain and chromosome 8 of DAOM197198 strain is  
394 over 1.1 Mb. **C) Chromosomes carrying MAT locus also vary in size.** C2 and 4401 strains  
395 carry the same MAT type, MAT6. However, chromosome sizes still differ by 700 kb.

396 **Figure 2:** Chromatin folding inside of the *R. irregularis* nucleus and visualization of intra- and  
397 inter-chromosomal physical interactions in Hi-C maps. **A) Schematic showing the compaction  
398 of chromatin fibers inside of a nucleus.** Chromatin fibers physically interact with each other  
399 and may fold into regions called compartments and topologically associated domains. **B) Hi-C  
400 contact maps showing the compartmentalization in the chromosome 1 of the *R. irregularis*.**  
401 In these heat maps, created to demonstrate contact frequencies throughout the genome, genome  
402 coordinates are represented on both axes. In an individual chromosome, regions that interact with  
403 each other result in an increase in contact frequencies and reveals the compartmentalized nature  
404 of the chromosome. These bright squares highlight increased contact frequency within and  
405 between chromosomes, are further analyzed to group them into euchromatin or heterochromatin  
406 compartments. Left: For chromosome 1, the compartment shown in the red square belongs to  
407 compartment A, and is surrounded by two B-compartment regions shown in orange squares.  
408 Right: when the interactions of several chromosomes are analyzed, a “checkered” pattern  
409 indicates the genome arrangement of the euchromatin or heterochromatin compartments of *R.*  
410 *irregularis*. Telomeres are clearly visible in the Hi-C maps at the tip of each chromosome.

411

412 **Figure 3: A/B compartments have different gene and repeat densities, and their genes  
413 contain different pfam domains. A) The two compartments carry significantly different**

414 **gene and repeat densities.** The boxplots show the number of gene and repeats in 10kb intervals.  
415 T-test shows that compartment A has significantly higher gene density, and significantly lower  
416 repeat density compared to compartment B. **B) Gene numbers that carry specific Pfam**  
417 **domains also vary between compartments.** Circles highlight the total of number of genes  
418 carrying specific Pfam domains in located in compartment A (red circles) or B (blue circles),  
419 with the size of the circle being proportionate to the number of genes that carry that domain.  
420 Inter-strain variability in pfam domains is also evident within each compartment.

421 **Figure 4: Gene expression and methylation analyses for the A/B compartments.** T-test was  
422 conducted to show significance. **A) Genes in the A compartment show significantly higher**  
423 **expression levels measured in Transcripts Per Million (TPM) than genes in the B-**  
424 **compartment in all three conditions. B) Genes encoding secreted proteins are up-regulated**  
425 **in both in planta conditions in the B-compartment, but not in the A-compartment. a)**  
426 Compartment A shows significant upregulation of secreted proteins *in planta* Allium condition  
427 when compared to germinated spores. **b)** Compartment A does not show a significant secreted  
428 protein expression change when *in planta* Medicago expressions are compared to the expression  
429 of germinated spores. **c)** Compartment B shows significant upregulation of secreted proteins *in*  
430 *planta* Allium condition when compared to germinated spores. **d)** Compartment B shows  
431 significant upregulation of secreted proteins *in planta* Medicago condition when compared to  
432 germinated spores. **C) Gene median methylation frequencies of all methylated genes**  
433 **(methylation frequency median > 0) that are located in A/B compartments.** A compartment  
434 display significantly lower gene median methylation frequencies than the B compartment.

435

#### 436 **Supplemental figures and tables legends**

437 **Figure S1: *R. irregularis* C2, A1, B3 and 4401 strain chromosomes.** The length of all 33  
438 chromosomes is indicated in the karyoplots. Telomere repeats, MAT locus and small subunit  
439 rRNA locations are marked. Gene densities are shown in red, and repeat densities are shown in  
440 blue color.

441 **Figure S2:** Bubble plot showing 10 most abundant transposable elements and their distribution  
442 in five assemblies of *R. irregularis* strains.

443 **Figure S3: Gene orthologies and Pfam domain numbers in five strains of *R. irregularis*.** a)  
444 Protein orthologs of A1, B3, C2, DAOM-197198 and 4401 strains. b) **Pfam protein domain**  
445 **abundance comparison between five *R. irregularis* strains.** After the 100 most abundant Pfam  
446 protein domains were selected, the frequency values were transformed using a t-test. This way,  
447 relative enrichment (red) and relative depletion (blue) were shown.

448 **Figure S4: Hierarchical clustering of *k*-mer distance estimations between chromosomes of**  
449 **the strains.**

450 **Figure S5: Heat map showing Hi-C contact frequencies between 33 chromosomes for strain**  
451 **DAOM-197198, C2, A1, B3 and 4401.** Regions having higher contact frequencies are found in  
452 close contact in the nucleus, whereas regions having fewer contact frequencies are far away from  
453 each other.

454 **Figure S6: Heat map showing Hi-C contact probabilities of individual chromosomes of**  
455 **strain DAOM-197198.** Chromosomal regions having higher contact probabilities are found in  
456 close contact with each other, whereas regions having fewer contact probabilities are far away  
457 from each other. PCA eigenvectors were calculated for 10kb intervals and were plotted under the  
458 chromosome contact maps.

459 **Figure S7: Heat map showing Hi-C contact probabilities of individual chromosomes of**  
460 **strain C2.** Chromosomal regions having higher contact probabilities are found in close contact  
461 with each other, whereas regions having fewer contact probabilities are far away from each  
462 other. PCA eigenvectors were calculated for 10kb intervals and were plotted under the  
463 chromosome contact maps.

464 **Figure S8: Heat map showing Hi-C contact probabilities of individual chromosomes of**  
465 **strain A1** Chromosomal regions having higher contact probabilities are found in close contact  
466 with each other, whereas regions having fewer contact probabilities are far away from each  
467 other. PCA eigenvectors were calculated for 10kb intervals and were plotted under the  
468 chromosome contact maps.

469 **Figure S9: Heat map showing Hi-C contact probabilities of individual chromosomes of**  
470 **strain B3** Chromosomal regions having higher contact probabilities are found in close contact  
471 with each other, whereas regions having fewer contact probabilities are far away from each



472 other. PCA eigenvectors were calculated for 10kb intervals and were plotted under the  
473 chromosome contact maps.

474 **Figure S10: Heat map showing Hi-C contact probabilities of individual chromosomes of**  
475 **strain 4401** Chromosomal regions having higher contact probabilities are found in close contact  
476 with each other, whereas regions having fewer contact probabilities are far away from each  
477 other. PCA eigenvectors were calculated for 10kb intervals and were plotted under the  
478 chromosome contact maps.

479 **Figure S11: Strain-specific chromosomal differentiation events can be observed in Hi-C**  
480 **contact maps.** Differentiation events that can be observed on contact maps and synteny plots  
481 were shown with an orange arrow. Repeat densities of the chromosomes are shown in blue color,  
482 and the synteny blocks are shown in purple. **a) Strain-specific repeat expansion found in**  
483 **chromosome 8 of strain 4401.** A) A repeat expansion event can be observed in chromosome 8  
484 of 4401 strain, between regions 1Mb and 3Mb. As the same repeats get expanded, the contact of  
485 Hi-C reads in that region increase, leading to the increased brightness. B) Synteny blocks  
486 between chromosome 8 from DAOM-197198 and 4401 shows absence of synteny blocks in the  
487 repeat expansion region. In the regions showing no synteny between the two strains, DAOM-  
488 197198 strain has 157 genes and 1240 repeats whereas 4401 strain has 389 genes and 2799  
489 repeats. **b) Strain specific inversion event in chromosome 18 of strain C2.** A) An inversion  
490 event can be observed in chromosome 18 of C2 strain, around 2Mb region. This differentiation  
491 event also causes an abnormality in the contact map around that region. B) Synteny blocks  
492 between chromosome 18 from DAOM-197198 and C2 show multiple inversion events. **c)**  
493 **Strain specific inversion event in chromosome 17 of strain A1.** A) An inversion event can be  
494 observed in chromosome 17 of A1 strain, before 1 Mb region. This differentiation event also  
495 causes an abnormality in the contact map around that region. B) Synteny blocks between  
496 chromosome 17 from DAOM-197198 and A1 show multiple inversion events. **d) Strain specific**  
497 **inversion event in chromosome 18 of strain B3.** A) An inversion event can be observed in  
498 chromosome 18 of B3 strain, around 2Mb region. This differentiation event also causes an  
499 abnormality in the contact map around that region. B) Synteny blocks between chromosome 18  
500 from DAOM-197198 and B3 show multiple inversion events.

501 **Figure S12: Distribution of core and dispensable genes in compartments A and B.** Protein  
502 orthologs of A1, C2 and DAOM-197198 strains were identified with FastOrtho (Wattam *et al.*,  
503 2014), using following parameters: 50% identity and 50% coverage. The genes were then  
504 grouped into A and B compartments. Core and core duplicated gene numbers were added up in  
505 each compartment to represent the “core group” count, and dispensable, specific and specific  
506 duplicated gene numbers were added up to make up the “dispensable group” count.

507 **Figure S13: A)** For each A/B compartment, the median methylation frequencies are collected  
508 and their distribution is plotted. The A compartment display higher median methylation  
509 frequencies than the B compartment. Highly methylated CpG sites (median methylation  
510 frequency > 80%) occur more frequently in the A compartment. **B)** CpG methylation frequencies  
511 of transposable elements in compartments A and B. Individual CpG methylation frequencies of  
512 transposable elements found in compartments A and B are shown as green dots. Methylation  
513 medians are shown as red dots.

514 **Figure S14: Example of inversions in synteny blocks between chromosome 13 of DAOM-**  
515 **197198, C2 and A1 strains.** The colors on the karyoplots represent the compartments.  
516 Compartment A is represented by blue color, whereas compartment B is represented by red  
517 color. Synteny blocks are created by MCScanx(Wang *et al.*, 2012), and inversions are  
518 highlighted. Orange links show inverted synteny blocks between DAOM-197198 and A1, and  
519 green links show inverted synteny blocks between DAOM-197198 and C2. Majority of the  
520 inversions are observed in compartment B.

521 **Table S1:** Location and number of ribosomal RNA operons within and across strains analyzed in  
522 this study.

523 **Table S2: A/B compartment properties in the model strain DAOM-197198.** The A-  
524 compartment is more gene-dense, while the B-compartment is more repeat-rich. However, the B-  
525 compartment has significantly more secreted proteins, candidate apoplasmic effectors and  
526 candidate cytoplasmic effectors than the A-compartment (Fisher’s exact test: \* indicates  $p <$   
527 0.05).

528 **Table S3: Comparison of A and B compartment similarity in DAOM-197198, C2 and A1**  
529 **strains.** Overall, A compartment is more conserved with higher similarity between strains  
530 compared to B compartment.

## 531 References

- 532 **Arima Genomics. 2019.** 01\_mapping\_arima.sh.
- 533 **Badet T, Oggenfuss U, Abraham L, McDonald BA, Croll D. 2020.** A 19-isolate reference-  
534 quality global pangenome for the fungal wheat pathogen *Zymoseptoria tritici*. *BMC Biology* **18**.
- 535 **Bertazzoni S, Williams AH, Jones DA, Syme RA, Tan K-C, Hane JK. 2018.** Accessories  
536 Make the Outfit: Accessory Chromosomes and Other Dispensable DNA Regions in Plant-  
537 Pathogenic Fungi. *Molecular Plant-Microbe Interactions*® **31**: 779–788.
- 538 **Bonfante P, Anca IA. 2009.** Plants, mycorrhizal fungi, and bacteria: A network of interactions.  
539 *Annual Review of Microbiology* **63**: 363–383.
- 540 **Bruns TD, Corradi N, Redecker D, Taylor JW, Öpik M. 2018.** Glomeromycotina: what is a  
541 species and why should we care? *New Phytologist* **220**: 963–967.
- 542 **Chen ECCH, Mathieu S, Sedziewska-Toro K, Peart M, Pelin A, Ndikumana S, Ropars J,**  
543 **Dreissig S, Fuchs J, Brachmann A, et al. 2018a.** Single nucleus sequencing reveals evidence of  
544 inter-nucleus recombination in arbuscular mycorrhizal fungi. *eLife* **8**.
- 545 **Chen ECH, Morin E, Beaudet D, Noel J, Yildirim G, Ndikumana S, Charron P, St-Onge C,**  
546 **Giorgi J, Krüger M, et al. 2018b.** High intraspecific genome diversity in the model arbuscular  
547 mycorrhizal symbiont *Rhizophagus irregularis*. *New Phytologist* **220**: 1161–1171.
- 548 **Corradi N, Bonfante P. 2012.** The Arbuscular Mycorrhizal Symbiosis: Origin and Evolution of  
549 a Beneficial Plant Infection (J Heitman, Ed.). *PLoS Pathogens* **8**: e1002600.
- 550 **Corradi N, Brachmann A. 2017.** *Fungal Mating in the Most Widespread Plant Symbionts?*  
551 Elsevier.
- 552 **Corradi N, Croll D, Colard A, Kuhn G, Ehinger M, Sanders IR. 2007.** Gene copy number  
553 polymorphisms in an arbuscular mycorrhizal fungal population. *Applied and Environmental*  
554 *Microbiology* **73**: 366–369.
- 555 **Corradi N, Hijri M, Fumagalli L, Sanders IR. 2004.** Arbuscular mycorrhizal fungi  
556 (Glomeromycota) harbour ancient fungal tubulin genes that resemble those of the chytrids  
557 (Chytridiomycota). *Fungal Genetics and Biology* **41**: 1037–1045.
- 558 **Dallaire AA. 2021.** Transcriptional activity and epigenetic regulation of transposable ele-  
559 ments in the symbiotic fungus *Rhizophagus irregularis*. *bioRxiv*: 2021.03.30.436303.
- 560 **Dekker J, Heard E. 2015.** Structural and functional diversity of Topologically Associating  
561 Domains. *FEBS Letters* **589**: 2877–2884.

- 562 **Delaux PM, Schornack S. 2021.** Plant evolution driven by interactions with symbiotic and  
563 pathogenic microbes. *Science* **371**.
- 564 **Denton JF, Lugo-Martinez J, Tucker AE, Schrider DR, Warren WC, Hahn MW. 2014.**  
565 Extensive Error in the Number of Genes Inferred from Draft Genome Assemblies. *PLoS*  
566 *Computational Biology* **10**.
- 567 **El-Gebali S, Mistry J, Bateman A, Eddy SR, Luciani A, Potter SC, Qureshi M, Richardson**  
568 **LJ, Salazar GA, Smart A, et al. 2019.** The Pfam protein families database in 2019. *Nucleic*  
569 *Acids Research* **47**: D427–D432.
- 570 **Falk M, Feodorova Y, Naumova N, Imakaev M, Lajoie BR, Leonhardt H, Joffe B, Dekker**  
571 **J, Fudenberg G, Solovei I, et al. 2019.** Heterochromatin drives compartmentalization of  
572 inverted and conventional nuclei. *Nature* **570**.
- 573 **Flynn JM, Hubley R, Goubert C, Rosen J, Clark AG, Feschotte C, Smit AF. 2020.**  
574 RepeatModeler2 for automated genomic discovery of transposable element families.  
575 *Proceedings of the National Academy of Sciences of the United States of America* **117**: 9451–  
576 9457.
- 577 **Fortin J-P, Hansen KD. 2015.** Reconstructing A/B compartments as revealed by Hi-C using  
578 long-range correlations in epigenetic data. *Genome Biology* **16**: 1–23.
- 579 **Frantzeskakis L, Kusch S, Panstruga R. 2019.** The need for speed: compartmentalized  
580 genome evolution in filamentous phytopathogens. *Molecular Plant Pathology* **20**: 3–7.
- 581 **Galazka JM, Klocko AD, Uesaka M, Honda S, Selker EU, Freitag M. 2016.** Neurospora  
582 chromosomes are organized by blocks of importin alpha-dependent heterochromatin that are  
583 largely independent of H3K9me3. *Genome Research* **26**: 1069–1080.
- 584 **Garmaroodi HS, Taga M. 2007.** Duplication of a conditionally dispensable chromosome  
585 carrying pea pathogenicity (PEP) gene clusters in *Nectria haematococca*. *Molecular Plant-*  
586 *Microbe Interactions* **20**: 1495–1504.
- 587 **Gel B, Serra E. 2017.** KaryoploteR: An R/Bioconductor package to plot customizable genomes  
588 displaying arbitrary data. *Bioinformatics* **33**: 3088–3090.
- 589 **Ghurye J, Pop M, Koren S, Bickhart D, Chin CS. 2017.** Scaffolding of long read assemblies  
590 using long range contact information. *BMC Genomics* **18**: 527.
- 591 **Ghurye J, Rhie A, Walenz BP, Schmitt A, Selvaraj S, Pop M, Phillippy AM, Koren S. 2019.**  
592 Integrating Hi-C links with assembly graphs for chromosome-scale assembly. *PLoS*  
593 *Computational Biology* **15**: e1007273.
- 594 **Hancock JM, Bishop MJ. 2004.** HMMer. In: Dictionary of Bioinformatics and Computational  
595 Biology. Chichester, UK: John Wiley & Sons, Ltd.
- 596 **Jerković I, Szabo Q, Bantignies F, Cavalli G. 2020.** Higher-Order Chromosomal Structures  
597 Mediate Genome Function. *Journal of Molecular Biology* **432**: 676–681.

- 598 **Kamel L, Tang N, Malbreil M, San Clemente H, Le Marquer M, Roux C, dit Frey NF.**  
599 **2017.** The comparison of expressed candidate secreted proteins from two arbuscular mycorrhizal  
600 fungi unravels common and specific molecular tools to invade different host plants. *Frontiers in*  
601 *Plant Science* **8**.
- 602 **Kempfer R, Pombo A. 2020.** Methods for mapping 3D chromosome architecture. *Nature*  
603 *Reviews Genetics* **21**: 207–226.
- 604 **Kim S, Liachko I, Brickner DG, Cook K, Noble WS, Brickner JH, Shendure J, Dunham**  
605 **MJ. 2017.** The dynamic three-dimensional organization of the diploid yeast genome. *eLife* **6**.
- 606 **Kloppholz S, Kuhn H, Requena N. 2011.** A secreted fungal effector of glomus intraradices  
607 promotes symbiotic biotrophy. *Current Biology* **21**: 1204–1209.
- 608 **Koch AM, Kuhn G, Fontanillas P, Fumagalli L, Goudet J, Sanders IR. 2004.** High genetic  
609 variability and low local diversity in a population of arbuscular mycorrhizal fungi. *Proceedings*  
610 *of the National Academy of Sciences of the United States of America* **101**: 2369–2374.
- 611 **Kokkoris V, Chagnon PL, Yildirim G, Clarke K, Goh D, MacLean AM, Dettman J, Stefani**  
612 **F, Corradi N. 2021.** Host identity influences nuclear dynamics in arbuscular mycorrhizal fungi.  
613 *Current Biology* **31**: 1531-1538.e6.
- 614 **Kokkoris V, Stefani F, Dalpé Y, Dettman J, Corradi N. 2020.** Nuclear Dynamics in the  
615 Arbuscular Mycorrhizal Fungi. *Trends in Plant Science* **25**: 765–778.
- 616 **Koren S, Walenz BP, Berlin K, Miller JR, Bergman NH, Phillippy AM. 2017.** Canu:  
617 Scalable and accurate long-read assembly via adaptive  $\kappa$ -mer weighting and repeat separation.  
618 *Genome Research* **27**: 722–736.
- 619 **Krogh A, Larsson B, Von Heijne G, Sonnhammer ELL. 2001.** Predicting transmembrane  
620 protein topology with a hidden Markov model: Application to complete genomes. *Journal of*  
621 *Molecular Biology* **305**: 567–580.
- 622 **Kurtz S, Phillippy A, Delcher AL, Smoot M, Shumway M, Antonescu C, Salzberg SL. 2004.**  
623 Versatile and open software for comparing large genomes. *Genome biology* **5**: 12.
- 624 **Lea AJ, Vockley CM, Johnston RA, Del Carpio CA, Barreiro LB, Reddy TE, Tung J. 2018.**  
625 Genome-wide quantification of the effects of DNA methylation on human gene regulation. *eLife*  
626 **7**.
- 627 **Li H. 2013.** Aligning sequence reads, clone sequences and assembly contigs with BWA-MEM.
- 628 **Li W, Cowley A, Uludag M, Gur T, McWilliam H, Squizzato S, Park YM, Buso N, Lopez**  
629 **R. 2015.** The EMBL-EBI bioinformatics web and programmatic tools framework. *Nucleic Acids*  
630 *Research* **43**: W580–W584.
- 631 **Li X, Huang X, Chen G, Zou L, Wei L, Hua J. 2018.** Complete genome sequence of the  
632 sesame pathogen *Ralstonia solanacearum* strain SEPPX 05. *Genes and Genomics* **40**: 657–668.

- 633 **Lin K, Limpens E, Zhang Z, Ivanov S, Saunders DGO, Mu D, Pang E, Cao H, Cha H, Lin**  
634 **T, et al. 2014.** Single Nucleus Genome Sequencing Reveals High Similarity among Nuclei of an  
635 Endomycorrhizal Fungus. *PLoS Genetics* **10**.
- 636 **Love MI, Huber W, Anders S. 2014.** Moderated estimation of fold change and dispersion for  
637 RNA-seq data with DESeq2. *Genome Biology* **15**: 550.
- 638 **Lutzoni F, Nowak MD, Alfaro ME, Reeb V, Miadlikowska J, Krug M, Arnold AE, Lewis**  
639 **LA, Swofford DL, Hibbett D, et al. 2018.** Contemporaneous radiations of fungi and plants  
640 linked to symbiosis. *Nature Communications* **9**: 1–11.
- 641 **Maeda T, Kobayashi Y, Kameoka H, Okuma N, Takeda N, Yamaguchi K, Bino T,**  
642 **Shigenobu S, Kawaguchi M. 2018.** Evidence of non-tandemly repeated rDNAs and their  
643 intragenomic heterogeneity in *Rhizophagus irregularis*. *Communications Biology* **1**.
- 644 **Malar MC, Krüger M, Krüger C, Wang Y, Stajich JE, Keller J, Chen ECH, Yildirim G,**  
645 **Villeneuve-Laroche M, Roux C, et al. 2021a.** The genome of *Geosiphon pyriformis* reveals  
646 ancestral traits linked to the emergence of the arbuscular mycorrhizal symbiosis. *Current Biology*  
647 **31**: 1570-1577.e4.
- 648 **Malar MC, Roux C, Corradi N. 2021b.** Regulation of mating genes during arbuscular  
649 mycorrhizal isolate co-existence—where is the evidence? *The ISME Journal* **2021 15:8 15**:  
650 2173–2179.
- 651 **Marçais G, Delcher AL, Phillippy AM, Coston R, Salzberg SL, Zimin A. 2018.** MUMmer4:  
652 A fast and versatile genome alignment system. *PLoS Computational Biology* **14**.
- 653 **Martin FM, Uroz S, Barker DG. 2017.** Ancestral alliances: Plant mutualistic symbioses with  
654 fungi and bacteria. *Science* **356**.
- 655 **Mathieu S, Cusant L, Roux C, Corradi N. 2018a.** Arbuscular mycorrhizal fungi: intraspecific  
656 diversity and pangenomes. *New Phytologist* **220**: 1129–1134.
- 657 **McCarthy CGP, Fitzpatrick DA. 2019.** Pan-genome analyses of model fungal species.  
658 *Microbial Genomics* **5**.
- 659 **Montoliu-Nerin M, Sánchez-García M, Bergin C, Grabherr M, Ellis B, Kutschera VE,**  
660 **Kierczak M, Johannesson H, Rosling A. 2020.** Building de novo reference genome assemblies  
661 of complex eukaryotic microorganisms from single nuclei. *Scientific Reports* **10**.
- 662 **Morin E, Miyauchi S, San Clemente H, Chen ECH, Pelin A, de la Providencia I,**  
663 **Ndikumana S, Beaudet D, Hainaut M, Drula E, et al. 2019.** Comparative genomics of  
664 *Rhizophagus irregularis*, *R. cerebriforme*, *R. diaphanus* and *Gigaspora rosea* highlights specific  
665 genetic features in Glomeromycotina. *New Phytologist* **222**: 1584–1598.
- 666 **Ondov BD, Treangen TJ, Melsted P, Mallonee AB, Bergman NH, Koren S, Phillippy AM.**  
667 **2016.** Mash: Fast genome and metagenome distance estimation using MinHash. *Genome Biology*  
668 **17**: 1–14.

- 669 **Patro R, Duggal G, Love MI, Irizarry RA, Kingsford C. 2017.** Salmon provides fast and bias-  
670 aware quantification of transcript expression. *Nature Methods* **14**: 417–419.
- 671 **Petersen TN, Brunak S, Von Heijne G, Nielsen H. 2011.** SignalP 4.0: Discriminating signal  
672 peptides from transmembrane regions. *Nature Methods* **8**: 785–786.
- 673 **Plett JM, Martin F. 2012.** Poplar root exudates contain compounds that induce the expression  
674 of MiSSP7 in *Laccaria bicolor*. *Plant Signaling and Behavior* **7**.
- 675 **Pombo A, Dillon N. 2015.** Three-dimensional genome architecture: Players and mechanisms.  
676 *Nature Reviews Molecular Cell Biology* **16**: 245–257.
- 677 **Quinlan AR, Hall IM. 2010.** BEDTools: A flexible suite of utilities for comparing genomic  
678 features. *Bioinformatics* **26**: 841–842.
- 679 **Ramírez F, Bhardwaj V, Arrigoni L, Lam KC, Grüning BA, Villaveces J, Habermann B,  
680 Akhtar A, Manke T. 2018.** High-resolution TADs reveal DNA sequences underlying genome  
681 organization in flies. *Nature Communications* **9**: 1–15.
- 682 **Reinhardt D, Roux C, Corradi N, Di Pietro A. 2021.** Lineage-Specific Genes and Cryptic Sex:  
683 Parallels and Differences between Arbuscular Mycorrhizal Fungi and Fungal Pathogens. *Trends  
684 in Plant Science* **26**: 111–123.
- 685 **Riley R, Charron P, Idnurm A, Farinelli L, Dalpé Y, Martin F, Corradi N. 2014.** Extreme  
686 diversification of the mating type-high-mobility group (MATA-HMG) gene family in a plant-  
687 associated arbuscular mycorrhizal fungus. *New Phytologist* **201**: 254–268.
- 688 **Roach MJ, Schmidt SA, Borneman AR. 2018.** Purge Haplotigs: Allelic contig reassignment  
689 for third-gen diploid genome assemblies. *BMC Bioinformatics* **19**: 1–10.
- 690 **Ropars J, Toro KSS, Noel J, Pelin A, Charron P, Farinelli L, Marton T, Krüger M, Fuchs  
691 J, Brachmann A, et al. 2016.** Evidence for the sexual origin of heterokaryosis in arbuscular  
692 mycorrhizal fungi. *Nature Microbiology* **1**: 16033.
- 693 **Savary R, Masclaux FG, Wyss T, Droh G, Cruz Corella J, Machado AP, Morton JB,  
694 Sanders IR. 2018.** A population genomics approach shows widespread geographical distribution  
695 of cryptic genomic forms of the symbiotic fungus *Rhizophagus irregularis*. *ISME Journal* **12**:  
696 17–30.
- 697 **Schmitt AD, Hu M, Ren B. 2016.** Genome-wide mapping and analysis of chromosome  
698 architecture. *Nature Reviews Molecular Cell Biology* **17**: 743–755.
- 699 **Schwessinger B. 2016.** High quality DNA from Fungi for long read sequencing e.g. Pacbio.  
700 *Protocols.io*: 1–6.
- 701 **Serghi EU, Kokkoris V, Cornell C, Dettman J, Stefani F, Corradi N. 2021.** Homo- and  
702 Dikaryons of the Arbuscular Mycorrhizal Fungus *Rhizophagus irregularis* Differ in Life History  
703 Strategy. *Frontiers in Plant Science* **12**: 1544.

- 704 **Servant N, Varoquaux N, Lajoie BR, Viara E, Chen CJ, Vert JP, Heard E, Dekker J,**  
705 **Barillot E. 2015.** HiC-Pro: An optimized and flexible pipeline for Hi-C data processing. *Genome*  
706 *Biology* **16**.
- 707 **Simão FA, Waterhouse RM, Ioannidis P, Kriventseva E V., Zdobnov EM. 2015.** BUSCO:  
708 Assessing genome assembly and annotation completeness with single-copy orthologs.  
709 *Bioinformatics* **31**: 3210–3212.
- 710 **Smit AFA, Hubley R, Green P.** No Title. *RepeatMasker Open-4.0*.
- 711 **Soyer JL, El Ghalid M, Glaser N, Ollivier B, Linglin J, Grandaubert J, Balesdent MH,**  
712 **Connolly LR, Freitag M, Rouxel T, et al. 2014.** Epigenetic Control of Effector Gene  
713 Expression in the Plant Pathogenic Fungus *Leptosphaeria maculans*. *PLoS Genetics* **10**:  
714 e1004227.
- 715 **Spatafora JW, Chang Y, Benny GL, Lazarus K, Smith ME, Berbee ML, Bonito G, Corradi**  
716 **N, Grigoriev I, Gryganskyi A, et al. 2016.** A phylum-level phylogenetic classification of  
717 zygomycete fungi based on genome-scale data. *Mycologia* **108**: 1028–1046.
- 718 **Sperschneider J, Dodds PN. 2021.** EffectorP 3.0: prediction of apoplast and cytoplasmic  
719 effectors in fungi and oomycetes. *bioRxiv*: 454080.
- 720 **Sperschneider J, Jones AW, Nasim J, Xu B, Jacques S, Zhong C, Upadhyaya NM, Mago R,**  
721 **Hu Y, Figueroa M, et al. 2021.** The stem rust fungus *Puccinia graminis* f. sp. *tritici* induces  
722 centromeric small RNAs during late infection that are associated with genome-wide DNA  
723 methylation. *BMC Biology* 2021 19:1 **19**: 1–25.
- 724 **Spielmann M, Lupiáñez DG, Mundlos S. 2018.** Structural variation in the 3D genome. *Nature*  
725 *Reviews Genetics* **19**: 453–467.
- 726 **Stockinger H, Walker C, Schüßler A. 2009.** “*Glomus intraradices* DAOM197198”, a model  
727 fungus in arbuscular mycorrhiza research, is not *Glomus intraradices*. *New Phytologist* **183**:  
728 1176–1187.
- 729 **Szabo Q, Bantignies F, Cavalli G. 2019.** Principles of genome folding into topologically  
730 associating domains. *Science Advances* **5**.
- 731 **Tisserant E, Malbreil M, Kuo A, Kohler A, Symeonidi A, Balestrini R, Charron P,**  
732 **Duensing N, Frei Dit Frey N, Gianinazzi-Pearson V, et al. 2013.** Genome of an arbuscular  
733 mycorrhizal fungus provides insight into the oldest plant symbiosis. *Proceedings of the National*  
734 *Academy of Sciences of the United States of America* **110**: 20117–20122.
- 735 **Torres DE, Oggenfuss U, Croll D, Seidl MF. 2020.** Genome evolution in fungal plant  
736 pathogens: looking beyond the two-speed genome model. *Fungal Biology Reviews* **34**: 136–143.
- 737 **Vaser R, Sović I, Nagarajan N, Šikić M. 2017.** Fast and accurate de novo genome assembly  
738 from long uncorrected reads. *Genome Research* **27**: 737–746.



- 739 **Vlaardingerbroek I, Beerens B, Schmidt SM, Cornelissen BJC, Rep M. 2016.** Dispensable  
740 chromosomes in *Fusarium oxysporum* f. Sp. *lycopersici*. *Molecular Plant Pathology* **17**: 1455–  
741 1466.
- 742 **Walker BJ, Abeel T, Shea T, Priest M, Abouelliel A, Sakthikumar S, Cuomo CA, Zeng Q,**  
743 **Wortman J, Young SK, et al. 2014.** Pilon: An integrated tool for comprehensive microbial  
744 variant detection and genome assembly improvement. *PLoS ONE* **9**: 112963.
- 745 **Wang Y, Tang H, Debarry JD, Tan X, Li J, Wang X, Lee TH, Jin H, Marler B, Guo H, et**  
746 **al. 2012.** MCSanX: A toolkit for detection and evolutionary analysis of gene synteny and  
747 collinearity. *Nucleic Acids Research* **40**: e49.
- 748 **Wattam AR, Abraham D, Dalay O, Disz TL, Driscoll T, Gabbard JL, Gillespie JJ, Gough**  
749 **R, Hix D, Kenyon R, et al. 2014.** PATRIC, the bacterial bioinformatics database and analysis  
750 resource. *Nucleic Acids Research* **42**: D581.
- 751 **Winter DJ, Ganley ARD, Young CA, Liachko I, Schardl CL, Dupont PY, Berry D, Ram A,**  
752 **Scott B, Cox MP. 2018.** Repeat elements organise 3D genome structure and mediate  
753 transcription in the filamentous fungus *Epichloë festucae*. *PLoS Genetics* **14**.
- 754 **Wolff J, Bhardwaj V, Nothjunge S, Richard G, Renschler G, Gilsbach R, Manke T,**  
755 **Backofen R, Ramírez F, Grüning BA. 2018.** Galaxy HiCEXplorer: A web server for  
756 reproducible Hi-C data analysis, quality control and visualization. *Nucleic Acids Research* **46**:  
757 W11–W16.
- 758 **Wolff J, Rabbani L, Gilsbach R, Richard G, Manke T, Backofen R, Grüning BA. 2020.**  
759 Galaxy HiCEXplorer 3: A web server for reproducible Hi-C, capture Hi-C and single-cell Hi-C  
760 data analysis, quality control and visualization. *Nucleic Acids Research* **48**: W177–W184.
- 761 **Zeng T, Holmer R, Hontelez J, te Lintel-Hekkert B, Marufu L, de Zeeuw T, Wu F, Schijlen**  
762 **E, Bisseling T, Limpens E. 2018.** Host- and stage-dependent secretome of the arbuscular  
763 mycorrhizal fungus *Rhizophagus irregularis*. *Plant Journal* **94**: 411–425.
- 764 **Zheng H, Xie W. 2019.** The role of 3D genome organization in development and cell  
765 differentiation. *Nature Reviews Molecular Cell Biology* **20**: 535–550.

766

767 **Table 1 : *R. irregularis* strains genome assembly and annotation statistics**

|                                   | <b>DAOM197198</b> | <b>A1</b> | <b>B3</b> | <b>C2</b> | <b>4401</b> |
|-----------------------------------|-------------------|-----------|-----------|-----------|-------------|
| <b>Chromosome-scale scaffolds</b> |                   |           |           |           |             |
| <b>Total size</b>                 | 147.2 Mb          | 147.1 Mb  | 146.8 Mb  | 161.9 Mb  | 146.8 Mb    |
| <b># of scaffolds</b>             | 33                | 33        | 33        | 33        | 33          |
| <b>BUSCO</b>                      | 96%               | 96%       | 96%       | 96.5%     | 96.5%       |

|                         |            |           |            |           |           |
|-------------------------|------------|-----------|------------|-----------|-----------|
| <b>completeness</b>     |            |           |            |           |           |
| <b>Repeat content</b>   | 49.05%     | 49.00%    | 50%        | 54.87%    | 48.07%    |
| <b>Number of genes</b>  | 26,634     | 23,988    | 23,988     | 25,634    | 24,069    |
| <b>GC content</b>       | 27.82%     | 27.78%    | 27.81%     | 28.23%    | 27.81%    |
| <b>Unplaced contigs</b> |            |           |            |           |           |
| <b>Total size</b>       | 2.6 Mb     | 0.5 Mb    | 1.3 Mb     | 0.4 Mb    | 0.9 Mb    |
| <b># of contigs</b>     | 104        | 29        | 42         | 12        | 25        |
| <b>Assembly N/L50</b>   | 29/31.4 Kb | 7/25.5 Kb | 12/36.5 Kb | 4/50.8 Kb | 7/45.7 Kb |

768

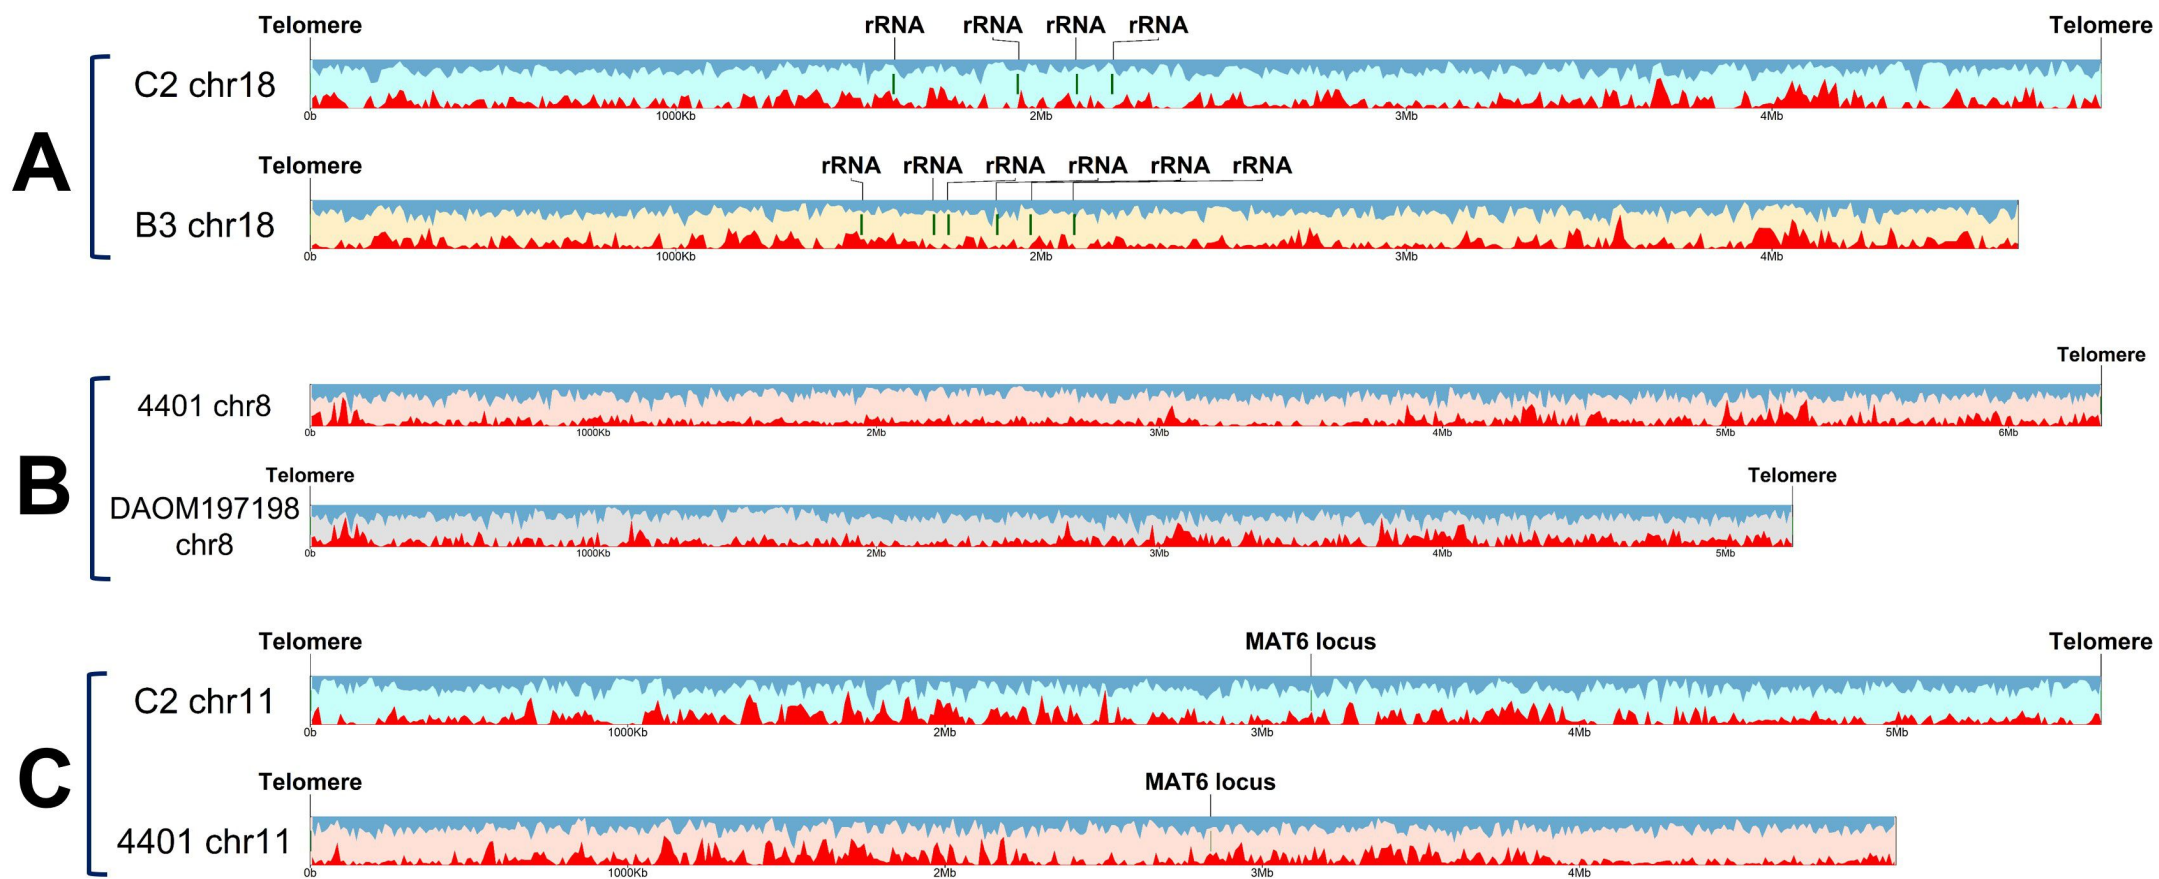

**A**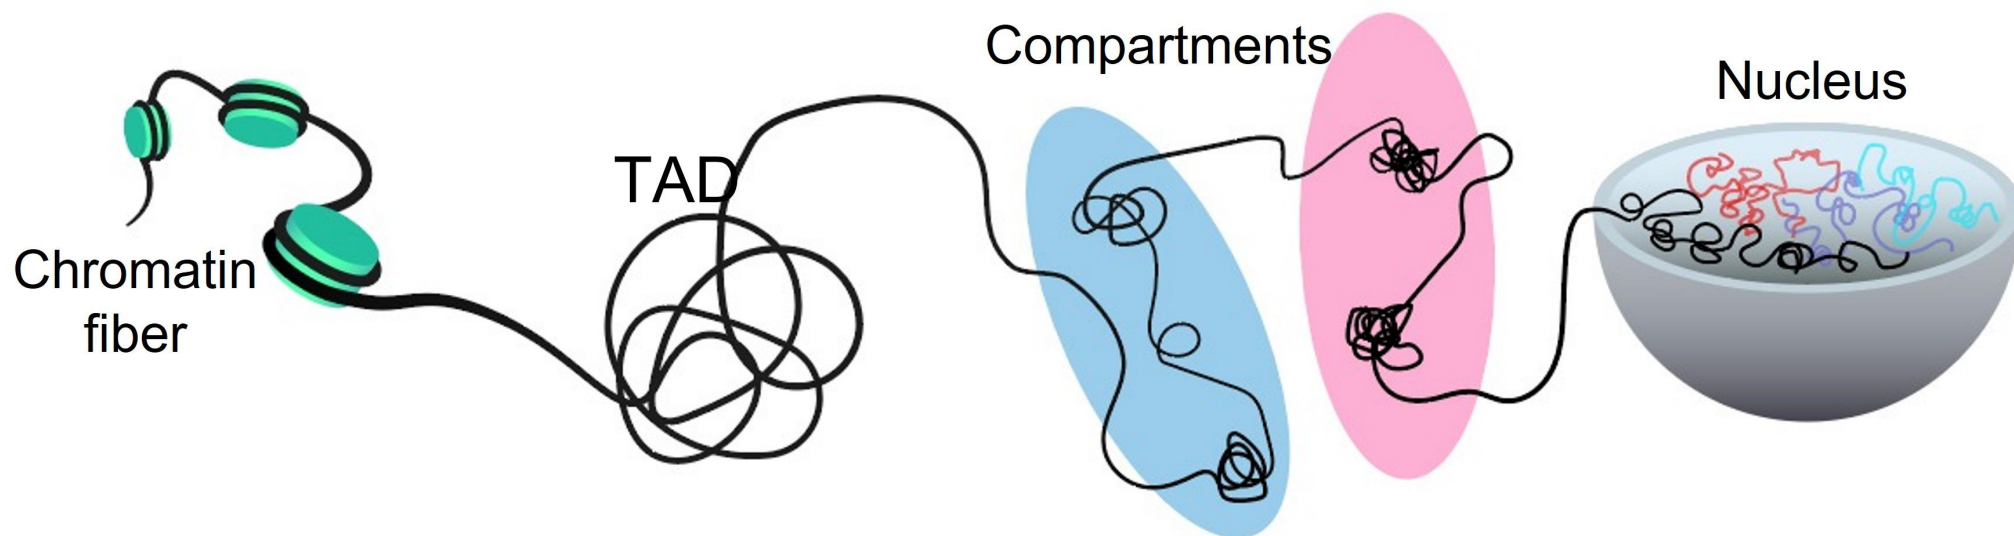**B**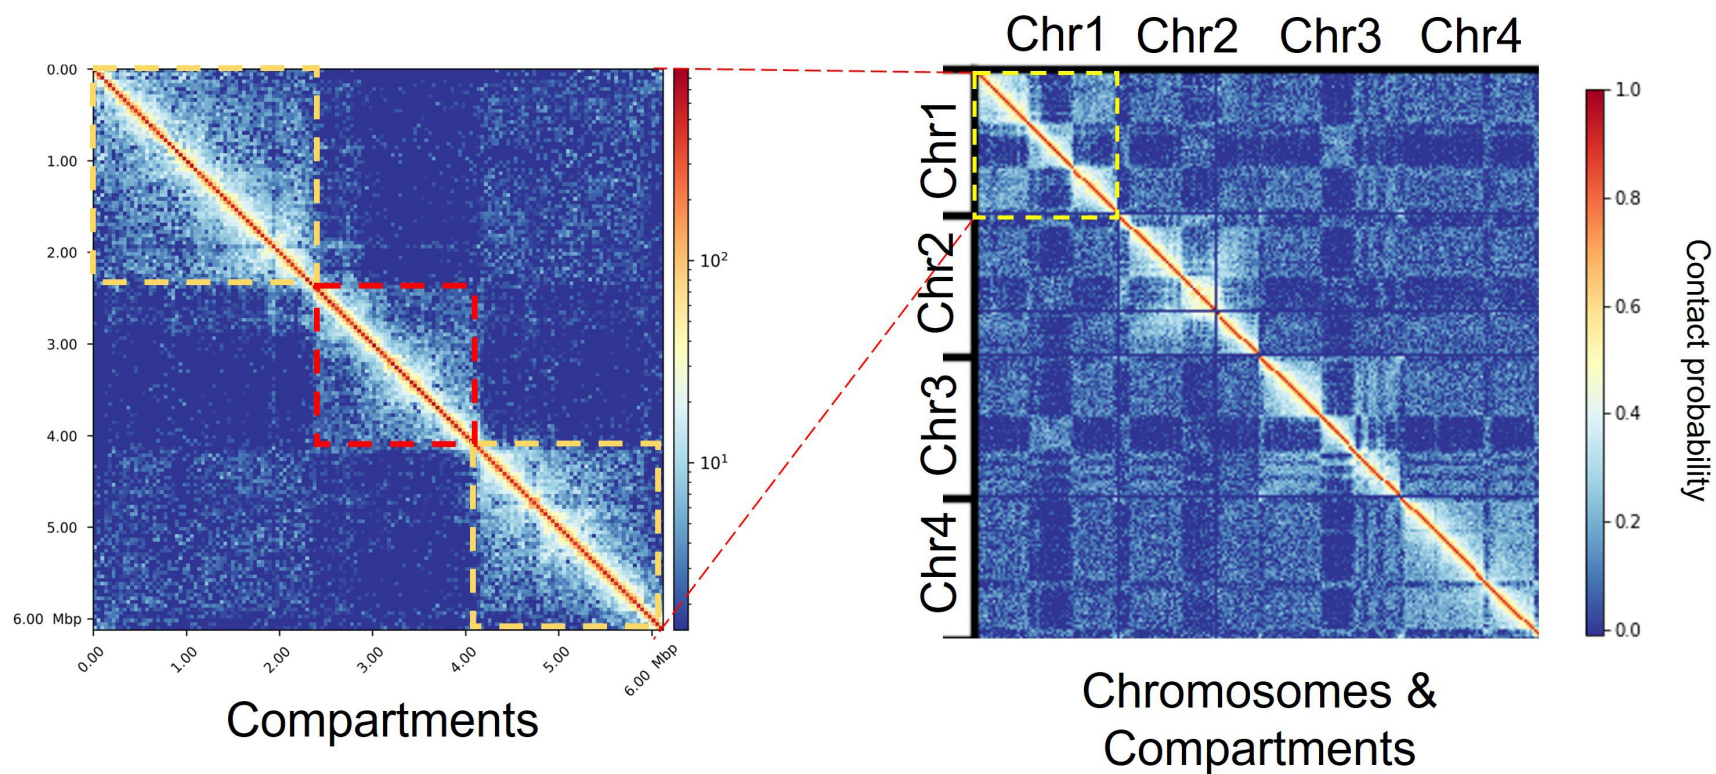

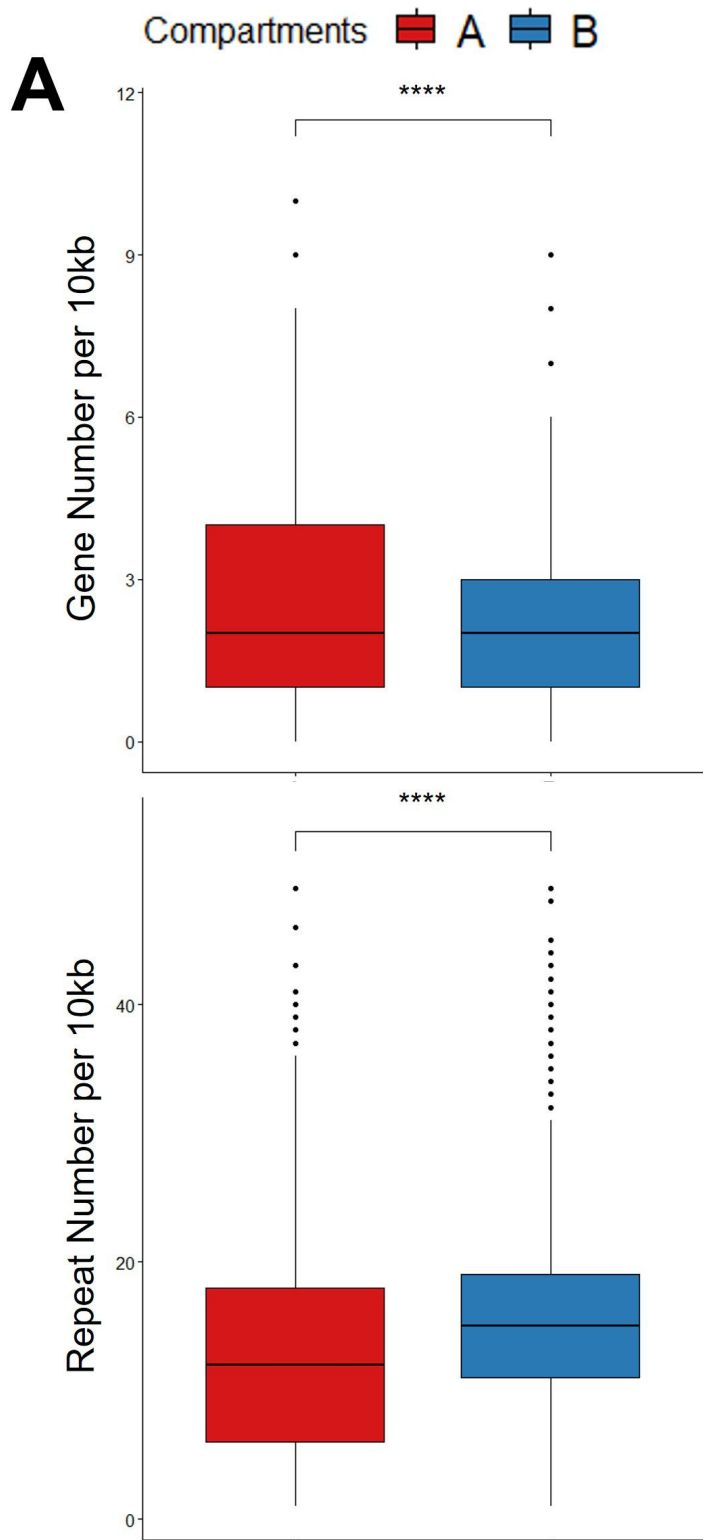

**B**

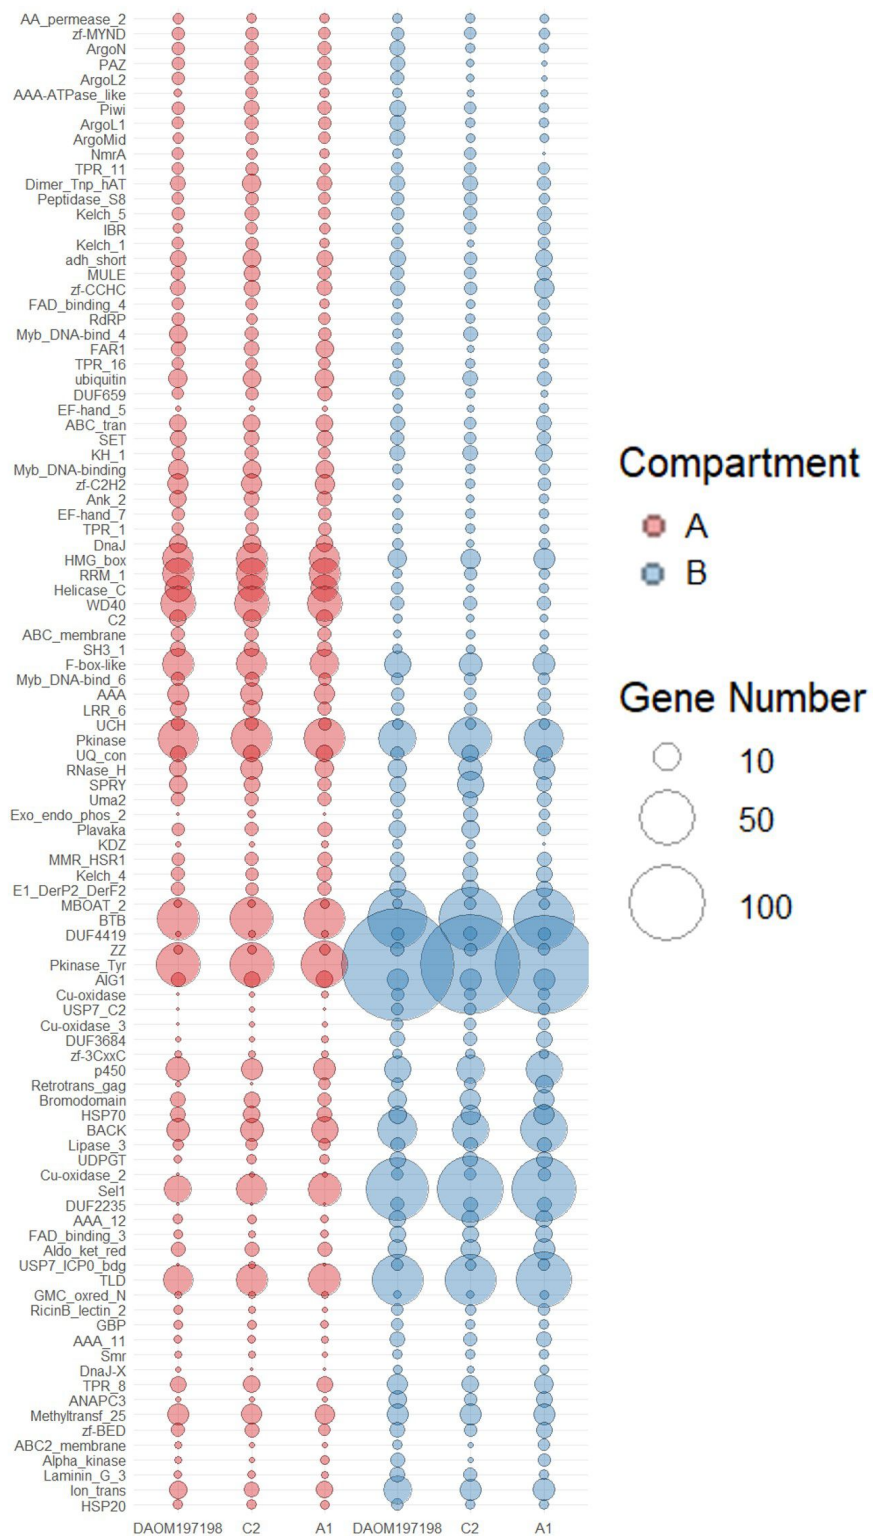

**A**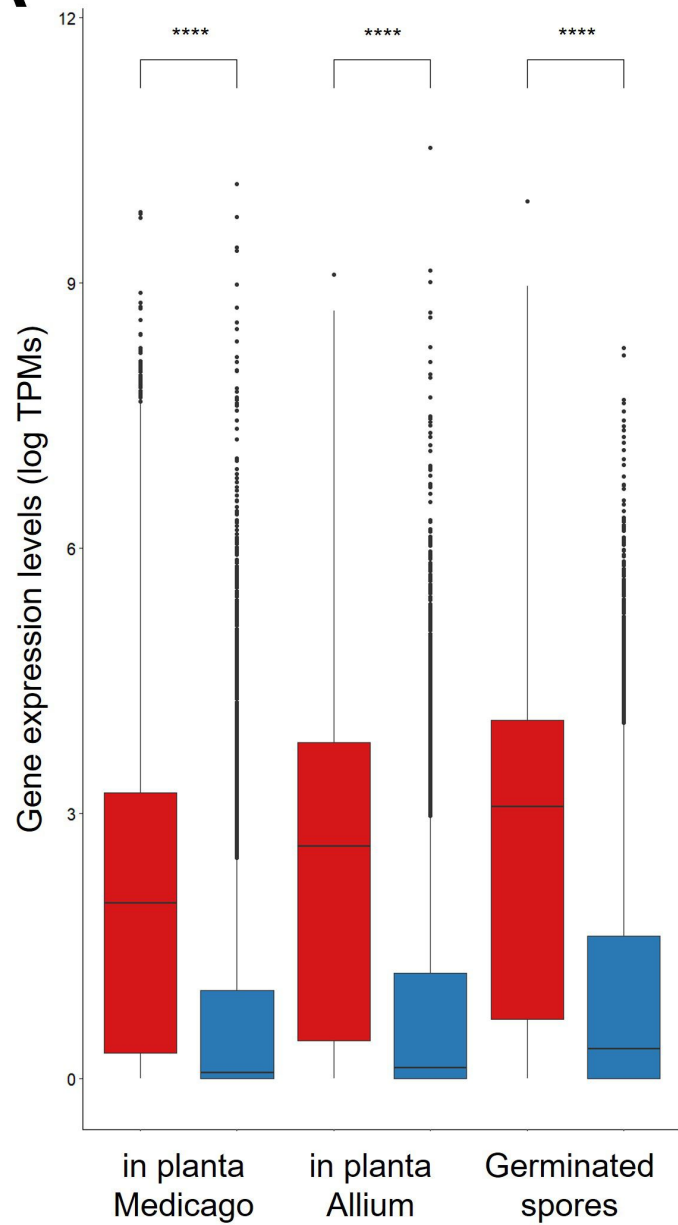**B**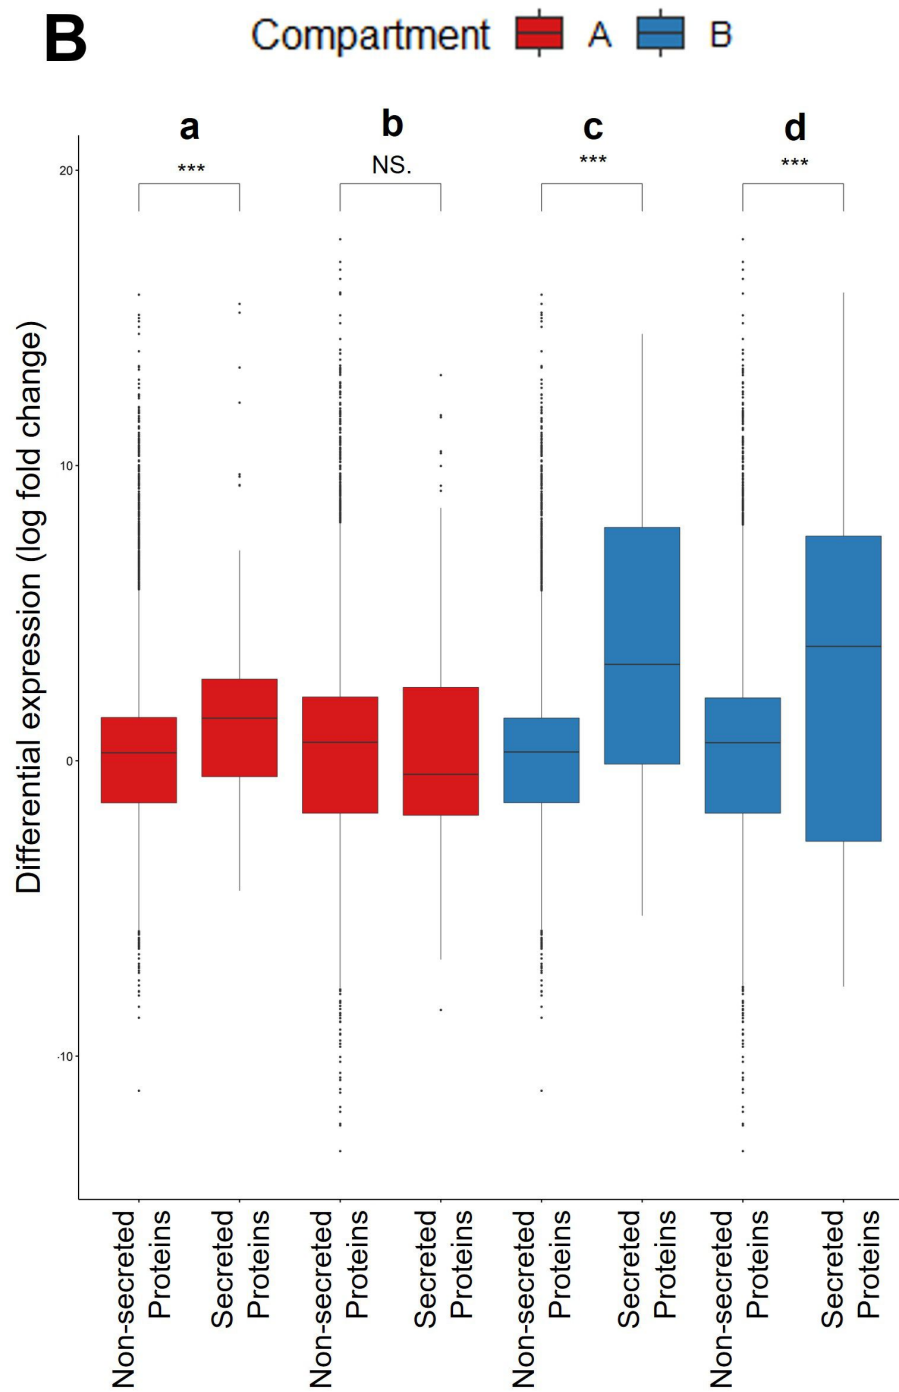**C**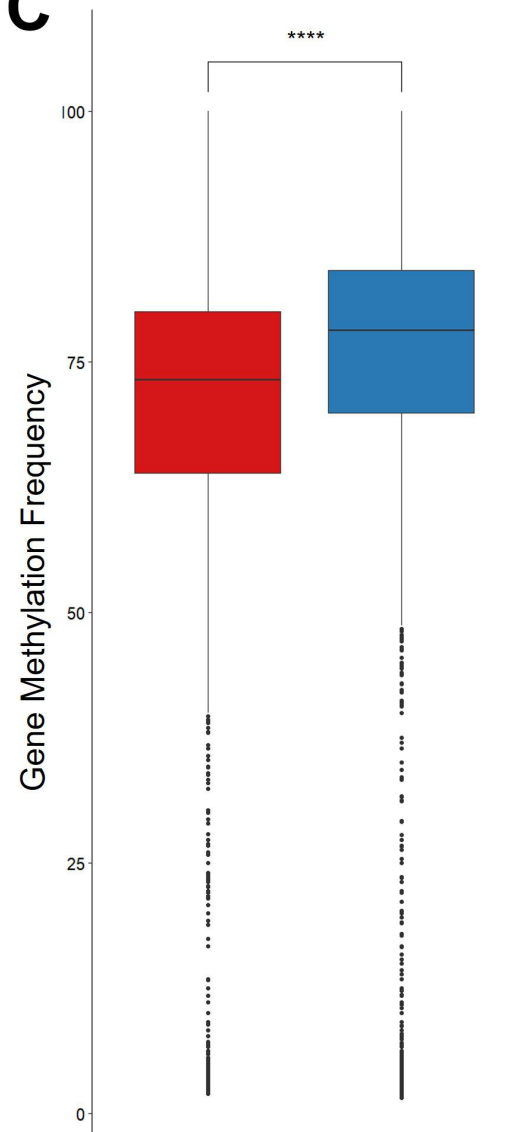

Source: https://www.biorxiv.org/content/10.1101/2021.08.12.456011v2.full.pdf
